# Supplementary material
Source: publisher figshare collection journal article supplement (https://acs.figshare.com/ndownloader/files/5125075)
Supplement: Supplementary file 1 [file 5125075]

 
#  CIF produced by WinGX routine CIF_UPDATE
#  Created on 2004-11-29 at 11:20:19
#  Using CIFtbx version 2.6.2 16 Jun 1998
 
#  Dictionary name : cif_core.dic
#  Dictionary vers : 2.2
#  Request file    : c:\wingx\files\archive.dat
#  CIF files read  : carim2 import dreduc struct
 
 
data_carim2
 
_audit_creation_date            2004-11-29T11:20:19-00:00
_audit_creation_method         'WinGX routine CIF_UPDATE'
_audit_conform_dict_name        cif_core.dic
_audit_conform_dict_version     2.2
_audit_conform_dict_location    ftp://ftp.iucr.org/pub/cif_core.dic
_publ_requested_category        FO
 
#----------------------------------------------------------------------------#
#                   CHEMICAL INFORMATION                                     #
#----------------------------------------------------------------------------#
 
_chemical_name_systematic
;
 ?
;
_chemical_name_common                   'Compound 1'
_chemical_formula_moiety                'C91 H102 N2 Si8'
_chemical_formula_sum                   'C91 H102 N2 Si8'
_chemical_formula_weight                1448.47
_chemical_compound_source               'synthesis as described'
 
#----------------------------------------------------------------------------#
#                   UNIT CELL INFORMATION                                    #
#----------------------------------------------------------------------------#
 
_symmetry_cell_setting                  Monoclinic
_symmetry_space_group_name_H-M          p21/c
_symmetry_space_group_name_Hall         '-P 2ybc'
_symmetry_Int_Tables_number             14
loop_
    _symmetry_equiv_pos_as_xyz
'x, y, z'
'-x, y+1/2, -z+1/2'
'-x, -y, -z'
'x, -y-1/2, z-1/2'
 
_cell_length_a                          13.394(3)

_cell_length_b                          32.088(3)
_cell_length_c                          10.1033(19)
_cell_angle_alpha                       90
_cell_angle_beta                        101.743(10)
_cell_angle_gamma                       90
_cell_volume                            4251.3(13)
_cell_formula_units_Z                   2
_cell_measurement_temperature           170(2)
_cell_measurement_reflns_used           90
_cell_measurement_theta_min             4.431
_cell_measurement_theta_max             18.773
_cell_measurement_wavelength            0.71073
 
#----------------------------------------------------------------------------#
#                   CRYSTAL INFORMATION                                      #
#----------------------------------------------------------------------------#
 
_exptl_crystal_description              prismatic
_exptl_crystal_colour                   white
_exptl_crystal_size_max                 0.30
_exptl_crystal_size_mid                 0.23
_exptl_crystal_size_min                 0.10
_exptl_crystal_density_diffrn           1.132
_exptl_crystal_density_method           'not measured'
_exptl_crystal_F_000                    1548
loop_
    _exptl_crystal_face_index_h
    _exptl_crystal_face_index_k
    _exptl_crystal_face_index_l
    _exptl_crystal_face_perp_dist
-1 15 0 0.141
0 -17 -1 0.068
0 1 19 0.074
-1 -4 -16 0.084
-3 -11 1 0.132
1 5 0 0.223
 
_exptl_special_details
;
 ?
;
 
#----------------------------------------------------------------------------#
#                   ABSORPTION CORRECTION                                    #
#----------------------------------------------------------------------------#
 
_exptl_absorpt_coefficient_mu           0.171
_exptl_absorpt_correction_type          none
 
#----------------------------------------------------------------------------#
#                   DATA COLLECTION                                          #
#----------------------------------------------------------------------------#
 
_diffrn_source                          'Enraf Nonius FR590'
_diffrn_ambient_temperature             170(2)
_diffrn_radiation_wavelength            0.71073
_diffrn_radiation_type                  MoK\a
_diffrn_radiation_monochromator         graphite
_diffrn_radiation_probe                 x-ray
_diffrn_detector                        'CCD plate'
_diffrn_orient_matrix_type              X=UH
_diffrn_orient_matrix_ub_11             0.01
_diffrn_orient_matrix_ub_12             0
_diffrn_orient_matrix_ub_13             0
_diffrn_orient_matrix_ub_21             0
_diffrn_orient_matrix_ub_22             0.01
_diffrn_orient_matrix_ub_23             0
_diffrn_orient_matrix_ub_31             0
_diffrn_orient_matrix_ub_32             0
_diffrn_orient_matrix_ub_33             0.01
_diffrn_measurement_device              '95mm CCD camera on \k-goniostat'
_diffrn_measurement_device_type         KappaCCD
_diffrn_measurement_method              CCD
_diffrn_reflns_av_R_equivalents         0.1659
_diffrn_reflns_av_unetI/netI            0.1173
_diffrn_reflns_number                   44338
_diffrn_reflns_limit_h_min              -17
_diffrn_reflns_limit_h_max              17
_diffrn_reflns_limit_k_min              -41
_diffrn_reflns_limit_k_max              41
_diffrn_reflns_limit_l_min              -13
_diffrn_reflns_limit_l_max              13
_diffrn_reflns_theta_min                5.01
_diffrn_reflns_theta_max                27.51
_diffrn_reflns_theta_full               27.51
_diffrn_measured_fraction_theta_full
                                        0.983
_diffrn_measured_fraction_theta_max
                                        0.983
_reflns_number_total                    9611
_reflns_number_gt                       6001
_reflns_threshold_expression            >2sigma(I)
 
#----------------------------------------------------------------------------#
#                   COMPUTER PROGRAMS USED                                   #
#----------------------------------------------------------------------------#
 
_computing_data_collection              'Collect (Nonius BV, 1997-2000)'
_computing_cell_refinement
                                  'Dirax/lsq (Duisenberg & Schreurs, 1989-2000)'
_computing_data_reduction
                                     'EvalCCD (Duisenberg & Schreurs 1990-2000)'
_computing_structure_solution           'SHELXS-97 (Sheldrick, 1997)'
_computing_structure_refinement         'SHELXL-97 (Sheldrick, 1997)'
_computing_molecular_graphics           'Ortep-3 for Windows (Farrugia, 1997)'
_computing_publication_material
                                   'WinGX publication routines (Farrugia, 1999)'
 
#----------------------------------------------------------------------------#
#                   REFINEMENT INFORMATION                                   #
#----------------------------------------------------------------------------#
 
_refine_special_details
;
 Refinement of F^2^ against ALL reflections.  The weighted R-factor wR and
 goodness of fit S are based on F^2^, conventional R-factors R are based
 on F, with F set to zero for negative F^2^. The threshold expression of
 F^2^ > 2sigma(F^2^) is used only for calculating R-factors(gt) etc. and is
 not relevant to the choice of reflections for refinement.  R-factors based
 on F^2^ are statistically about twice as large as those based on F, and R-
 factors based on ALL data will be even larger.
;
_refine_ls_structure_factor_coef        Fsqd
_refine_ls_matrix_type                  full
_refine_ls_weighting_scheme             calc
_refine_ls_weighting_details
         'calc w=1/[\s^2^(Fo^2^)+(0.0552P)^2^+2.2630P] where P=(Fo^2^+2Fc^2^)/3'
_atom_sites_solution_primary            direct
_atom_sites_solution_secondary          difmap
_atom_sites_solution_hydrogens          geom
_refine_ls_hydrogen_treatment           mixed
_refine_ls_extinction_method            none
_refine_ls_number_reflns                9611
_refine_ls_number_parameters            661
_refine_ls_number_restraints            0
_refine_ls_R_factor_all                 0.1203
_refine_ls_R_factor_gt                  0.0664
_refine_ls_wR_factor_ref                0.1624
_refine_ls_wR_factor_gt                 0.1389
_refine_ls_goodness_of_fit_ref          0.997
_refine_ls_restrained_S_all             0.997
_refine_ls_shift/su_max                 0.029
_refine_ls_shift/su_mean                0.004
_refine_diff_density_max                0.638
_refine_diff_density_min                -0.552
_refine_diff_density_rms                0.06
 
#----------------------------------------------------------------------------#
#                   ATOMIC TYPES, COORDINATES AND THERMAL PARAMETERS         #
#----------------------------------------------------------------------------#
 
loop_
    _atom_type_symbol
    _atom_type_description
    _atom_type_scat_dispersion_real
    _atom_type_scat_dispersion_imag
    _atom_type_scat_source
C C 0.0033 0.0016 'International Tables Vol C Tables 4.2.6.8 and 6.1.1.4'
H H 0 0 'International Tables Vol C Tables 4.2.6.8 and 6.1.1.4'
N N 0.0061 0.0033 'International Tables Vol C Tables 4.2.6.8 and 6.1.1.4'
Si Si 0.0817 0.0704 'International Tables Vol C Tables 4.2.6.8 and 6.1.1.4'
 
loop_
    _atom_site_label
    _atom_site_type_symbol
    _atom_site_fract_x
    _atom_site_fract_y
    _atom_site_fract_z
    _atom_site_U_iso_or_equiv
    _atom_site_adp_type
    _atom_site_occupancy
    _atom_site_symmetry_multiplicity
    _atom_site_calc_flag
    _atom_site_refinement_flags
    _atom_site_disorder_assembly
    _atom_site_disorder_group
H9B H 0.383(2) 0.1062(8) 0.601(3) 0.027(7) Uiso 1 1 d . . .
H8A H 0.243(2) 0.0713(8) 0.383(3) 0.026(7) Uiso 1 1 d . . .
H3B H 0.210(2) -0.0572(8) 0.675(3) 0.038(8) Uiso 1 1 d . . .
H2B H 0.140(2) -0.0053(9) 0.522(3) 0.037(8) Uiso 1 1 d . . .
H22 H 0.264(2) -0.1787(9) 0.566(3) 0.040(8) Uiso 1 1 d . . .
H7A H 0.357(3) -0.0159(10) 1.170(4) 0.058(10) Uiso 1 1 d . . .
H2A H 0.193(2) -0.0224(9) 0.408(3) 0.037(8) Uiso 1 1 d . . .
H62 H 0.514(3) 0.1653(11) 0.617(3) 0.056(10) Uiso 1 1 d . . .
H5A H 0.399(3) 0.0427(10) 0.768(3) 0.044(9) Uiso 1 1 d . . .
H25 H 0.028(3) -0.1865(10) 0.847(3) 0.055(10) Uiso 1 1 d . . .
H6B H 0.230(2) 0.0600(10) 0.779(3) 0.039(8) Uiso 1 1 d . . .
H26 H 0.028(2) -0.1323(10) 0.697(3) 0.041(9) Uiso 1 1 d . . .
H9A H 0.408(2) 0.0965(9) 0.462(3) 0.035(8) Uiso 1 1 d . . .
H5B H 0.374(2) 0.0001(10) 0.773(3) 0.044(9) Uiso 1 1 d . . .
H3A H 0.282(3) -0.0685(10) 0.585(3) 0.045(10) Uiso 1 1 d . . .
H6A H 0.204(3) 0.0147(10) 0.783(3) 0.053(10) Uiso 1 1 d . . .
H56 H 0.111(3) 0.2012(11) 0.406(4) 0.066(11) Uiso 1 1 d . . .
H42 H 0.443(2) 0.0542(10) 1.238(3) 0.047(9) Uiso 1 1 d . . .
H36 H 0.123(3) 0.0993(11) 0.942(3) 0.059(10) Uiso 1 1 d . . .
H43 H 0.555(3) 0.1089(12) 1.322(4) 0.082(12) Uiso 1 1 d . . .
H8B H 0.217(3) 0.0797(10) 0.516(3) 0.050(10) Uiso 1 1 d . . .
H32 H 0.160(3) -0.0064(10) 1.171(3) 0.052(10) Uiso 1 1 d . . .
H64 H 0.653(3) 0.2637(11) 0.488(3) 0.066(11) Uiso 1 1 d . . .
H66 H 0.368(3) 0.2296(10) 0.289(4) 0.061(11) Uiso 1 1 d . . .
H10A H 0.218(3) 0.1822(12) 0.232(3) 0.060(12) Uiso 1 1 d . . .
H33 H 0.000(3) 0.0054(12) 1.229(4) 0.079(12) Uiso 1 1 d . . .
H24 H 0.147(3) -0.2398(11) 0.856(3) 0.060(10) Uiso 1 1 d . . .
H7B H 0.404(3) -0.0227(12) 1.035(4) 0.075(12) Uiso 1 1 d . . .
H44 H 0.562(3) 0.1655(13) 1.180(4) 0.086(13) Uiso 1 1 d . . .
H12 H 0.316(2) -0.0849(10) 0.361(3) 0.043(9) Uiso 1 1 d . . .
H35 H 0.063(3) 0.2252(11) 0.784(4) 0.069(12) Uiso 1 1 d . . .
H10B H 0.278(3) 0.1458(11) 0.202(4) 0.069(11) Uiso 1 1 d . . .
H10C H 0.182(3) 0.1423(10) 0.261(3) 0.048(10) Uiso 1 1 d . . .
H34 H -0.099(3) 0.0628(12) 1.147(4) 0.085(13) Uiso 1 1 d . . .
H63 H 0.653(3) 0.2084(11) 0.640(3) 0.063(11) Uiso 1 1 d . . .
H23 H 0.270(3) -0.2343(11) 0.719(3) 0.058(10) Uiso 1 1 d . . .
H4B H 0.000(3) -0.0666(12) 0.368(4) 0.068(11) Uiso 1 1 d . . .
H53 H 0.226(3) 0.1979(11) 0.873(4) 0.068(11) Uiso 1 1 d . . .
H52 H 0.323(3) 0.1701(12) 0.737(4) 0.082(13) Uiso 1 1 d . . .
H46 H 0.339(3) 0.1136(11) 0.895(4) 0.071(11) Uiso 1 1 d . . .
H13 H 0.373(3) -0.1070(12) 0.181(4) 0.067(12) Uiso 1 1 d . . .
H4C H -0.023(3) -0.0749(11) 0.512(4) 0.065(11) Uiso 1 1 d . . .
H35A H -0.033(3) 0.1118(12) 0.994(3) 0.071(11) Uiso 1 1 d . . .
H7C H 0.296(3) -0.0364(12) 1.037(3) 0.063(12) Uiso 1 1 d . . .
H16 H 0.084(3) -0.1673(11) 0.290(3) 0.068(12) Uiso 1 1 d . . .
H14 H 0.284(3) -0.1584(13) 0.038(4) 0.093(14) Uiso 1 1 d . . .
H4A H -0.034(3) -0.1091(12) 0.404(3) 0.068(12) Uiso 1 1 d . . .
H65 H 0.507(3) 0.2748(13) 0.314(4) 0.093(14) Uiso 1 1 d . . .
H15 H 0.147(3) -0.1918(13) 0.094(4) 0.086(13) Uiso 1 1 d . . .
H45 H 0.454(3) 0.1714(14) 0.963(4) 0.097(14) Uiso 1 1 d . . .
H55 H 0.004(4) 0.2313(14) 0.548(4) 0.098(15) Uiso 1 1 d . . .
Si1 Si 0.30696(6) 0.02072(2) 0.55474(7) 0.02452(18) Uani 1 1 d . . .
Si2 Si 0.14144(6) -0.10423(2) 0.49466(7) 0.0291(2) Uani 1 1 d . . .
Si3 Si 0.28550(6) 0.03550(2) 1.00093(7) 0.0322(2) Uani 1 1 d . . .
Si4 Si 0.30929(6) 0.15955(2) 0.44241(7) 0.0302(2) Uani 1 1 d . . .
C1 C 0.5 0 0.5 0.0291(9) Uani 1 2 d S . .
C5 C 0.3460(2) 0.02344(10) 0.7427(3) 0.0306(6) Uani 1 1 d . . .
C3 C 0.2202(3) -0.06006(8) 0.5801(3) 0.0298(6) Uani 1 1 d . . .
C8 C 0.2684(2) 0.07295(8) 0.4804(3) 0.0294(6) Uani 1 1 d . . .
C31 C 0.1609(2) 0.04580(9) 1.0545(3) 0.0349(7) Uani 1 1 d . . .
N1 N 0.4084(2) 0.00273(8) 0.4895(2) 0.0374(6) Uani 1 1 d . . .
C2 C 0.2024(2) -0.01816(8) 0.5046(3) 0.0273(6) Uani 1 1 d . . .
C21 C 0.1444(2) -0.14910(8) 0.6158(3) 0.0284(6) Uani 1 1 d . . .
C6 C 0.2561(2) 0.03415(10) 0.8113(3) 0.0324(7) Uani 1 1 d . . .
C61 C 0.4237(2) 0.19384(8) 0.4534(3) 0.0313(6) Uani 1 1 d . . .
C11 C 0.1944(2) -0.12263(8) 0.3456(3) 0.0338(7) Uani 1 1 d . . .
C41 C 0.3797(2) 0.07827(9) 1.0596(3) 0.0338(7) Uani 1 1 d . . .
C51 C 0.2266(2) 0.18200(8) 0.5554(3) 0.0323(6) Uani 1 1 d . . .
C9 C 0.3527(2) 0.10633(8) 0.5066(3) 0.0314(6) Uani 1 1 d . . .
C23 C 0.2194(3) -0.21359(10) 0.7135(3) 0.0496(9) Uani 1 1 d . . .
C62 C 0.5113(2) 0.18745(9) 0.5529(3) 0.0364(7) Uani 1 1 d . . .
C25 C 0.0759(3) -0.18606(10) 0.7880(3) 0.0433(8) Uani 1 1 d . . .
C10 C 0.2362(3) 0.15757(13) 0.2649(3) 0.0450(8) Uani 1 1 d . . .
C7 C 0.3404(4) -0.01518(11) 1.0712(4) 0.0518(9) Uani 1 1 d . . .
C26 C 0.0742(3) -0.15266(10) 0.6999(3) 0.0397(7) Uani 1 1 d . . .
C33 C 0.0264(3) 0.02516(13) 1.1718(3) 0.0546(10) Uani 1 1 d . . .
C66 C 0.4263(3) 0.22743(9) 0.3661(3) 0.0458(8) Uani 1 1 d . . .
C34 C -0.0318(3) 0.05852(13) 1.1188(4) 0.0579(10) Uani 1 1 d . . .
C32 C 0.1210(3) 0.01865(11) 1.1387(3) 0.0453(8) Uani 1 1 d . . .
C52 C 0.2572(3) 0.18182(12) 0.6955(3) 0.0535(9) Uani 1 1 d . . .
C4 C 0.0062(3) -0.08719(12) 0.4366(4) 0.0469(9) Uani 1 1 d . . .
C12 C 0.2802(3) -0.10544(10) 0.3083(3) 0.0465(8) Uani 1 1 d . . .
C42 C 0.4477(3) 0.07722(11) 1.1841(3) 0.0474(8) Uani 1 1 d . . .
C63 C 0.5961(3) 0.21348(10) 0.5666(4) 0.0474(8) Uani 1 1 d . . .
C24 C 0.1485(3) -0.21652(10) 0.7942(3) 0.0426(8) Uani 1 1 d . . .
C54 C 0.1047(3) 0.21621(11) 0.7247(4) 0.0572(10) Uani 1 1 d . . .
C22 C 0.2180(3) -0.18018(10) 0.6260(3) 0.0423(8) Uani 1 1 d . . .
C46 C 0.3819(3) 0.11377(12) 0.9830(4) 0.0641(11) Uani 1 1 d . . .
C36 C 0.1002(3) 0.07952(10) 1.0027(3) 0.0494(9) Uani 1 1 d . . .
C13 C 0.3151(4) -0.11955(12) 0.1943(4) 0.0615(11) Uani 1 1 d . . .
C65 C 0.5116(3) 0.25315(10) 0.3796(4) 0.0565(10) Uani 1 1 d . . .
C64 C 0.5953(3) 0.24632(11) 0.4816(4) 0.0520(9) Uani 1 1 d . . .
C56 C 0.1327(3) 0.20020(11) 0.5047(4) 0.0493(8) Uani 1 1 d . . .
C15 C 0.1804(4) -0.16936(12) 0.1527(4) 0.0664(12) Uani 1 1 d . . .
C35 C 0.0049(3) 0.08604(12) 1.0339(4) 0.0608(10) Uani 1 1 d . . .
C43 C 0.5139(3) 0.11013(13) 1.2274(4) 0.0616(11) Uani 1 1 d . . .
C16 C 0.1458(3) -0.15521(10) 0.2650(3) 0.0487(9) Uani 1 1 d . . .
C44 C 0.5139(3) 0.14476(14) 1.1472(4) 0.0670(12) Uani 1 1 d . . .
C45 C 0.4467(4) 0.14694(14) 1.0256(4) 0.0805(14) Uani 1 1 d . . .
C53 C 0.1980(3) 0.19852(13) 0.7808(4) 0.0644(11) Uani 1 1 d . . .
C14 C 0.2639(4) -0.15134(12) 0.1174(4) 0.0711(14) Uani 1 1 d . . .
C55 C 0.0727(3) 0.21710(13) 0.5877(4) 0.0636(11) Uani 1 1 d . . .
 
loop_
    _atom_site_aniso_label
    _atom_site_aniso_U_11
    _atom_site_aniso_U_22
    _atom_site_aniso_U_33
    _atom_site_aniso_U_23
    _atom_site_aniso_U_13
    _atom_site_aniso_U_12
Si1 0.0218(4) 0.0218(4) 0.0320(4) -0.0028(3) 0.0103(3) 0.0000(3)
Si2 0.0292(4) 0.0196(4) 0.0378(4) 0.0015(3) 0.0049(3) 0.0003(3)
Si3 0.0380(5) 0.0288(4) 0.0302(4) 0.0009(3) 0.0078(3) 0.0008(4)
Si4 0.0322(5) 0.0231(4) 0.0336(4) -0.0002(3) 0.0026(3) 0.0002(3)
C1 0.043(3) 0.0179(18) 0.0308(19) -0.0019(15) 0.0182(18) 0.0044(19)
C5 0.0254(16) 0.0310(16) 0.0350(15) -0.0011(13) 0.0049(12) 0.0003(14)
C3 0.0301(17) 0.0233(14) 0.0359(16) 0.0010(11) 0.0063(13) 0.0004(13)
C8 0.0263(16) 0.0254(14) 0.0365(16) -0.0006(12) 0.0064(13) -0.0011(13)
C31 0.0446(18) 0.0354(15) 0.0257(13) -0.0074(12) 0.0098(13) -0.0057(15)
N1 0.0313(15) 0.0401(14) 0.0456(14) -0.0052(11) 0.0195(11) 0.0054(12)
C2 0.0254(15) 0.0214(13) 0.0344(15) -0.0012(11) 0.0046(12) -0.0007(12)
C21 0.0311(16) 0.0219(13) 0.0309(13) -0.0024(10) 0.0032(12) -0.0043(12)
C6 0.0317(17) 0.0345(16) 0.0311(14) -0.0054(13) 0.0069(13) 0.0018(15)
C61 0.0402(18) 0.0182(13) 0.0382(15) -0.0020(11) 0.0147(13) -0.0022(13)
C11 0.0440(19) 0.0216(13) 0.0363(14) 0.0044(11) 0.0094(13) 0.0062(13)
C41 0.0344(17) 0.0378(16) 0.0319(14) -0.0026(12) 0.0126(13) -0.0009(14)
C51 0.0333(16) 0.0199(13) 0.0426(16) -0.0021(11) 0.0050(13) -0.0057(13)
C9 0.0302(17) 0.0234(14) 0.0397(16) -0.0009(12) 0.0052(14) -0.0018(13)
C23 0.054(2) 0.0383(18) 0.058(2) 0.0160(15) 0.0155(18) 0.0173(18)
C62 0.0370(18) 0.0328(16) 0.0411(16) -0.0036(13) 0.0120(14) -0.0069(14)
C25 0.041(2) 0.051(2) 0.0409(17) 0.0073(14) 0.0146(15) -0.0037(17)
C10 0.043(2) 0.044(2) 0.0440(19) -0.0024(17) 0.0007(16) -0.0017(19)
C7 0.061(3) 0.039(2) 0.053(2) 0.0092(16) 0.005(2) 0.008(2)
C26 0.043(2) 0.0346(17) 0.0431(17) 0.0012(13) 0.0129(15) 0.0082(16)
C33 0.055(2) 0.070(3) 0.0429(19) 0.0013(18) 0.0181(17) -0.014(2)
C66 0.057(2) 0.0303(16) 0.0515(19) 0.0047(14) 0.0153(18) -0.0005(17)
C34 0.049(2) 0.075(3) 0.056(2) -0.017(2) 0.0262(19) -0.009(2)
C32 0.050(2) 0.053(2) 0.0317(16) 0.0009(15) 0.0059(15) -0.0053(18)
C52 0.049(2) 0.066(2) 0.0456(19) -0.0028(17) 0.0080(17) 0.008(2)
C4 0.0311(19) 0.0373(19) 0.069(2) 0.0088(18) 0.0022(18) -0.0010(16)
C12 0.066(2) 0.0262(16) 0.054(2) 0.0032(15) 0.0272(18) 0.0082(17)
C42 0.044(2) 0.048(2) 0.0481(19) -0.0002(16) 0.0026(16) 0.0109(18)
C63 0.042(2) 0.0416(19) 0.060(2) -0.0062(16) 0.0149(18) -0.0120(17)
C24 0.050(2) 0.0367(17) 0.0396(17) 0.0099(14) 0.0049(15) -0.0065(16)
C54 0.051(2) 0.050(2) 0.079(3) -0.0214(19) 0.032(2) -0.0069(19)
C22 0.043(2) 0.0395(18) 0.0491(18) 0.0122(14) 0.0191(16) 0.0079(16)
C46 0.088(3) 0.056(2) 0.0421(19) 0.0041(17) -0.002(2) -0.030(2)
C36 0.059(2) 0.0382(18) 0.058(2) 0.0030(16) 0.0290(18) 0.0061(18)
C13 0.083(3) 0.040(2) 0.074(3) 0.0199(19) 0.047(2) 0.022(2)
C65 0.083(3) 0.0287(17) 0.069(2) 0.0064(17) 0.041(2) -0.0064(19)
C64 0.052(2) 0.0377(19) 0.073(2) -0.0104(17) 0.030(2) -0.0188(18)
C56 0.045(2) 0.0470(19) 0.055(2) -0.0025(16) 0.0076(17) 0.0115(17)
C15 0.111(4) 0.043(2) 0.041(2) -0.0049(17) 0.004(2) 0.010(2)
C35 0.059(3) 0.049(2) 0.081(3) -0.0014(19) 0.031(2) 0.016(2)
C43 0.040(2) 0.070(3) 0.065(2) -0.021(2) -0.0118(18) 0.006(2)
C16 0.065(3) 0.0351(18) 0.0423(18) -0.0017(14) 0.0023(17) 0.0037(18)
C44 0.053(3) 0.066(3) 0.081(3) -0.019(2) 0.011(2) -0.024(2)
C45 0.106(4) 0.069(3) 0.062(2) 0.004(2) 0.007(3) -0.049(3)
C53 0.069(3) 0.078(3) 0.047(2) -0.012(2) 0.016(2) 0.000(2)
C14 0.136(5) 0.038(2) 0.046(2) 0.0096(17) 0.034(3) 0.039(3)
C55 0.051(2) 0.062(2) 0.078(3) -0.012(2) 0.013(2) 0.013(2)
 
 
#----------------------------------------------------------------------------#
#                   MOLECULAR GEOMETRY                                       #
#----------------------------------------------------------------------------#
 
_geom_special_details
;
 All esds (except the esd in the dihedral angle between two l.s. planes)
 are estimated using the full covariance matrix.  The cell esds are taken
 into account individually in the estimation of esds in distances, angles
 and torsion angles; correlations between esds in cell parameters are only
 used when they are defined by crystal symmetry.  An approximate (isotropic)
 treatment of cell esds is used for estimating esds involving l.s. planes.
;
loop_
    _geom_bond_atom_site_label_1
    _geom_bond_atom_site_label_2
    _geom_bond_distance
    _geom_bond_site_symmetry_2
    _geom_bond_publ_flag
Si1 N1 1.725(3) . ?
Si1 C8 1.866(3) . ?
Si1 C5 1.867(3) . ?
Si1 C2 1.867(3) . ?
Si2 C4 1.869(3) . ?
Si2 C3 1.869(3) . ?
Si2 C11 1.885(3) . ?
Si2 C21 1.885(3) . ?
Si3 C7 1.865(3) . ?
Si3 C6 1.876(3) . ?
Si3 C41 1.877(3) . ?
Si3 C31 1.886(3) . ?
Si4 C10 1.861(3) . ?
Si4 C61 1.872(3) . ?
Si4 C9 1.876(3) . ?
Si4 C51 1.887(3) . ?
C1 N1 1.213(3) . ?
C1 N1 1.213(3) 3_656 ?
C5 C6 1.545(4) . ?
C3 C2 1.541(4) . ?
C8 C9 1.540(4) . ?
C31 C36 1.390(4) . ?
C31 C32 1.396(4) . ?
C21 C22 1.392(4) . ?
C21 C26 1.395(4) . ?
C61 C66 1.398(4) . ?
C61 C62 1.396(4) . ?
C11 C12 1.394(4) . ?
C11 C16 1.402(4) . ?
C41 C46 1.381(4) . ?
C41 C42 1.396(4) . ?
C51 C52 1.391(4) . ?
C51 C56 1.387(4) . ?
C23 C24 1.375(5) . ?
C23 C22 1.387(4) . ?
C62 C63 1.393(4) . ?
C25 C24 1.372(5) . ?
C25 C26 1.390(4) . ?
C33 C34 1.367(5) . ?
C33 C32 1.392(5) . ?
C66 C65 1.393(5) . ?
C34 C35 1.388(5) . ?
C52 C53 1.392(5) . ?
C12 C13 1.403(5) . ?
C42 C43 1.391(5) . ?
C63 C64 1.358(5) . ?
C54 C55 1.364(5) . ?
C54 C53 1.384(6) . ?
C46 C45 1.386(5) . ?
C36 C35 1.392(5) . ?
C13 C14 1.378(6) . ?
C65 C64 1.377(6) . ?
C56 C55 1.385(5) . ?
C15 C14 1.370(6) . ?
C15 C16 1.386(5) . ?
C43 C44 1.375(6) . ?
C44 C45 1.369(6) . ?
 
loop_
    _geom_angle_atom_site_label_1
    _geom_angle_atom_site_label_2
    _geom_angle_atom_site_label_3
    _geom_angle
    _geom_angle_site_symmetry_1
    _geom_angle_site_symmetry_3
    _geom_angle_publ_flag
N1 Si1 C8 108.78(14) . . ?
N1 Si1 C5 108.97(13) . . ?
C8 Si1 C5 111.40(14) . . ?
N1 Si1 C2 106.16(13) . . ?
C8 Si1 C2 111.08(13) . . ?
C5 Si1 C2 110.28(14) . . ?
C4 Si2 C3 110.05(16) . . ?
C4 Si2 C11 109.84(17) . . ?
C3 Si2 C11 109.73(14) . . ?
C4 Si2 C21 108.55(16) . . ?
C3 Si2 C21 110.13(12) . . ?
C11 Si2 C21 108.51(12) . . ?
C7 Si3 C6 110.70(17) . . ?
C7 Si3 C41 109.27(18) . . ?
C6 Si3 C41 109.11(14) . . ?
C7 Si3 C31 110.29(18) . . ?
C6 Si3 C31 106.44(13) . . ?
C41 Si3 C31 111.01(13) . . ?
C10 Si4 C61 109.94(17) . . ?
C10 Si4 C9 111.54(16) . . ?
C61 Si4 C9 108.78(13) . . ?
C10 Si4 C51 109.73(16) . . ?
C61 Si4 C51 108.28(12) . . ?
C9 Si4 C51 108.49(13) . . ?
N1 C1 N1 180.0(2) . 3_656 ?
C6 C5 Si1 112.6(2) . . ?
C2 C3 Si2 114.66(19) . . ?
C9 C8 Si1 115.0(2) . . ?
C36 C31 C32 116.7(3) . . ?
C36 C31 Si3 120.8(2) . . ?
C32 C31 Si3 122.4(3) . . ?
C1 N1 Si1 148.42(19) . . ?
C3 C2 Si1 114.64(19) . . ?
C22 C21 C26 116.9(3) . . ?
C22 C21 Si2 121.1(2) . . ?
C26 C21 Si2 122.0(2) . . ?
C5 C6 Si3 116.2(2) . . ?
C66 C61 C62 116.3(3) . . ?
C66 C61 Si4 122.7(3) . . ?
C62 C61 Si4 121.0(2) . . ?
C12 C11 C16 116.7(3) . . ?
C12 C11 Si2 123.9(2) . . ?
C16 C11 Si2 119.5(3) . . ?
C46 C41 C42 116.2(3) . . ?
C46 C41 Si3 121.1(2) . . ?
C42 C41 Si3 122.7(2) . . ?
C52 C51 C56 115.8(3) . . ?
C52 C51 Si4 121.7(3) . . ?
C56 C51 Si4 122.5(2) . . ?
C8 C9 Si4 114.1(2) . . ?
C24 C23 C22 120.6(3) . . ?
C63 C62 C61 122.1(3) . . ?
C24 C25 C26 119.8(3) . . ?
C25 C26 C21 121.9(3) . . ?
C34 C33 C32 119.8(4) . . ?
C65 C66 C61 121.3(3) . . ?
C33 C34 C35 119.7(4) . . ?
C33 C32 C31 122.2(4) . . ?
C51 C52 C53 122.8(4) . . ?
C11 C12 C13 121.7(4) . . ?
C43 C42 C41 121.5(3) . . ?
C64 C63 C62 120.1(4) . . ?
C25 C24 C23 119.6(3) . . ?
C55 C54 C53 119.7(4) . . ?
C23 C22 C21 121.2(3) . . ?
C41 C46 C45 122.9(4) . . ?
C35 C36 C31 121.6(3) . . ?
C14 C13 C12 119.5(4) . . ?
C64 C65 C66 120.4(3) . . ?
C63 C64 C65 119.7(4) . . ?
C55 C56 C51 122.4(3) . . ?
C14 C15 C16 120.1(4) . . ?
C34 C35 C36 120.0(4) . . ?
C44 C43 C42 120.3(4) . . ?
C15 C16 C11 121.8(4) . . ?
C45 C44 C43 119.5(4) . . ?
C44 C45 C46 119.7(4) . . ?
C54 C53 C52 119.0(4) . . ?
C15 C14 C13 120.3(4) . . ?
C54 C55 C56 120.3(4) . . ?
 
